# Supplementary material for: Assortative mating and parental genetic relatedness drive the pathogenicity of variably expressive variants
Source: bioRxiv or medRxiv preprint supplement (doi:10.1101/2023.05.18.23290169), 2023-05-26
Supplement: Supplementary file [file media-1.pdf]

# Assortative mating drives pathogenicity of neurodevelopmental disorder-associated variants

## Table of Contents

|                                                                                          |   |
|------------------------------------------------------------------------------------------|---|
| SUPPLEMENTAL FIGURES.....                                                                | 2 |
| Figure S1. Increases in rare variant burden in 16p12.1 deletion families.....            | 2 |
| SUPPLEMENTAL TABLES .....                                                                | 3 |
| Supplementary Table 1. CNVs in the clinically ascertained CNV cohort.....                | 3 |
| Supplementary Table 2. Phenotypes assessed in the Simons Simplex Collection cohort. .... | 4 |
| Supplementary Table 3. Psychiatric phenotype frequencies in SPARK and the UK Biobank...  | 5 |
| SUPPLEMENTAL REFERENCES .....                                                            | 6 |

## SUPPLEMENTAL FIGURES

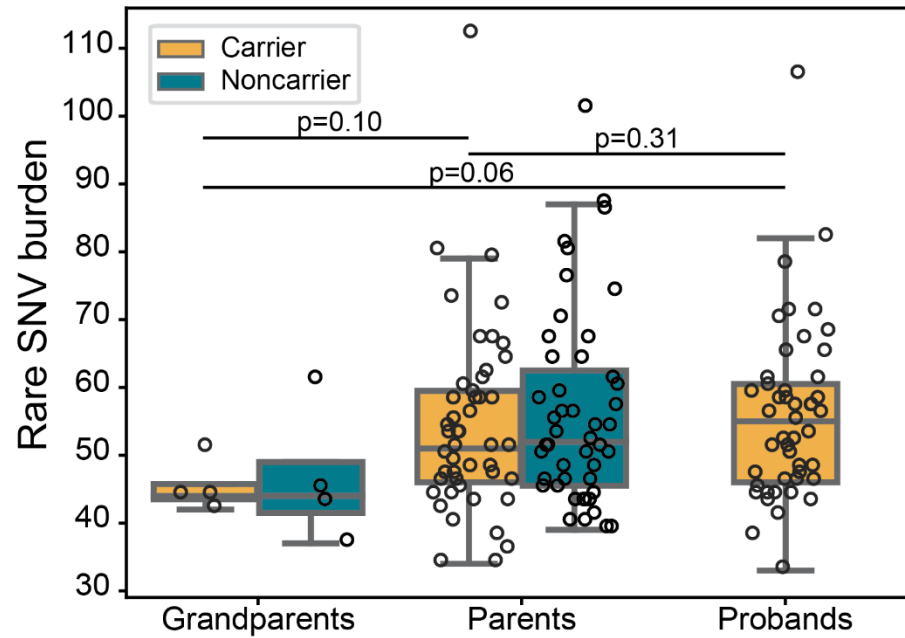

**Figure S1. Increases in rare variant burden in 16p12.1 deletion families.**

Rare, likely deleterious single nucleotide variant (SNV) burden in carrier and noncarrier grandparents and parents and probands in 16p12.1 deletion families. One tailed t-test, comparisons between carriers in each generation.

## SUPPLEMENTAL TABLES

**Supplementary Table 1. CNVs in the clinically ascertained CNV cohort.**

| Region                                  | Number of families |             |
|-----------------------------------------|--------------------|-------------|
|                                         | Deletion           | Duplication |
| <i>Syndromic</i>                        |                    |             |
| 5q35 (Sotos syndrome region)            | 1                  | 0           |
| 7q11.23 (Williams syndrome region)      | 15                 | 7           |
| 15q11-13 (Prader-Willi syndrome region) | 17                 | 0           |
| 17q11.2 (Smith-Magenis/Potocki-Lupski)  | 3                  | 4           |
| 17q21.31                                | 3                  | 0           |
| <b>Total Syndromic</b>                  | <b>39</b>          | <b>11</b>   |

|                                  |            |           |
|----------------------------------|------------|-----------|
| <i>Variably Expressive</i>       |            |           |
| 1q21.1                           | 18         | 26        |
| 3q29                             | 6          | 0         |
| 15q11.2                          | 32         | 0         |
| 15q13.3                          | 19         | 0         |
| 16p13.11                         | 20         | 21        |
| 16p11.2                          | 63         | 35        |
| 16p11.2 distal                   | 19         | 4         |
| 16p12.1                          | 8          | 0         |
| 17q12                            | 11         | 0         |
| 22q11.2 (DiGeorge/VCFS region)   | 25         | 0         |
| <b>Total Variably Expressive</b> | <b>221</b> | <b>86</b> |

**Supplementary Table 2. Phenotypes assessed in the Simons Simplex Collection cohort.**

| <b>Phenotype</b>                                                       | <b>Reference</b> |
|------------------------------------------------------------------------|------------------|
| Autism Diagnostic Observation Schedule (ADOS): social affect           | 1                |
| ADOS: restricted and repetitive behavior domain total score            | 1                |
| Autism Diagnostic interview (ADI): communication (verbal) domain score | 2                |
| ADI: restricted and repetitive behavior domain total score             | 2                |
| ADI: social domain total score                                         | 2                |
| Repetitive Behaviors Scale (RBS)                                       | 3                |
| Parent-reported Social Responsiveness Scale (SRS): total raw scores    | 4                |
| Social Communication Questionnaire (SCQ)                               | 5                |
| Insistence of sameness factor                                          | 6                |
| Social interaction factor                                              | 6                |
| Sensory-motor behavior factor                                          | 6                |
| Self-injurious behavior factor                                         | 6                |
| Idiosyncratic repetitive speech and behavior                           | 6                |
| Communication skills factor                                            | 6                |
| Vineland Adaptive Behavior Scales: composite standard scores           | 7                |
| Full-scale IQ                                                          |                  |
| Verbal IQ                                                              |                  |
| Nonverbal IQ                                                           |                  |
| Developmental Coordination Disorders Questionnaire                     | 8                |
| Child Behavior Checklist (CBCL) 2-5 internalizing                      | 9                |
| CBCL 2-5 externalizing                                                 | 9                |
| CBCL 6-18 internalizing                                                | 9                |
| CBCL 6-18 externalizing                                                | 9                |

**Supplementary Table 3. Psychiatric phenotype frequencies in SPARK and the UK Biobank.**

| <b>Disorder</b>        | <b>SPARK frequency</b> | <b>UK Biobank frequency</b> |
|------------------------|------------------------|-----------------------------|
| Anxiety                | 18.35% (2254/12284)    | 6.40% (2943/45958)          |
| Bipolar Disorder (BPD) | 3.54% (435/12284)      | 0.16% (74/45958)            |
| Depression             | 21.13% (2596/12284)    | 8.92% (4099/45958)          |
| Personality Disorder   | 1.38% (170/12284)      | 0.06% (29/45958)            |
| Schizophrenia          | 0.47% (58/12284)       | 0.03% (12/45958)            |

## SUPPLEMENTAL REFERENCES

1. Lord, C. *et al.* Autism diagnostic observation schedule–2nd edition (ADOS-2). *Los Angel. CA West. Psychol. Corp.* **284**, (2012).
2. Rutter, M., Le Couteur, A., Lord, C., & others. Autism diagnostic interview-revised. *Los Angel. CA West. Psychol. Serv.* **29**, 30 (2003).
3. Bodfish, J. W., Symons, F. J., Parker, D. E. & Lewis, M. H. Repetitive behavior scale–revised. *J. Autism Dev. Disord.* (1999).
4. Constantino, J. N. & Gruber, C. P. *Social responsiveness scale second edition (SRS-2): Manual.* (Western Psychological Services (WPS), 2012).
5. Rutter, M., Bailey, A. & Lord, C. *SCQ: the Social Communication Questionnaire.* (2003).
6. Warriar, V. *et al.* Genetic correlates of phenotypic heterogeneity in autism. *Nat. Genet.* **54**, 1293–1304 (2022).
7. Sparrow, S., Balla, D., Cicchetti, D. & Harrison, P. *Vineland Adaptive Behavior Scales.* (1984).
8. Wilson, B. N. *et al.* Psychometric Properties of the Revised Developmental Coordination Disorder Questionnaire. *Phys. Occup. Ther. Pediatr.* **29**, 182–202 (2009).
9. Achenbach, T. M. The Child Behavior Checklist and related instruments. in *The use of psychological testing for treatment planning and outcomes assessment, 2nd ed.* 429–466 (Lawrence Erlbaum Associates Publishers, 1999).
